# Supplementary material for: The Role of Dactylis Glomerata and Diesel Oil in the Formation of Microbiome and Soil Enzyme Activity
Source: PubMed Central journal article supplement (PMC7349710; doi:10.3390/s20123362), 2020-06-13
Supplement: sensors-20-03362-s001.pdf [file sensors-20-03362-s001.pdf]

**Supplementary Materials**

## The role of *Dactylis glomerata* and diesel oil in the formation of microbiome and soil enzyme activity

Agata Borowik, Jadwiga Wyszowska\*, Mirosław Kucharski and Jan Kucharski

**Table S1** Significance tests carried out using the analysis of variance (ANOVA)

| Parameters                            |                        | F         | P     |
|---------------------------------------|------------------------|-----------|-------|
| Numbers of microorganisms             | Organotrophic bacteria | 271.302   | 0.000 |
|                                       | Actinobacteria         | 3253.480  | 0.000 |
|                                       | Fungi                  | 560.760   | 0.000 |
| Ecophysiological diversity index (EP) | Organotrophic bacteria | 21.690    | 0.000 |
|                                       | Actinobacteria         | 10.740    | 0.004 |
|                                       | Fungi                  | 164.600   | 0.000 |
| Colony development index (CD)         | Organotrophic bacteria | 98.690    | 0.000 |
|                                       | Actinobacteria         | 64.250    | 0.000 |
|                                       | Fungi                  | 980.340   | 0.000 |
| Shannon-Weiner's diversity index      | Phylum                 | 125.591   | 0.000 |
|                                       | Class                  | 39.870    | 0.000 |
|                                       | Order                  | 4.172     | 0.047 |
|                                       | Family                 | 21.829    | 0.000 |
|                                       | Genus                  | 192.767   | 0.000 |
| Enzymes                               | Dehydrogenases         | 550.474   | 0.000 |
|                                       | Catalase               | 1822.381  | 0.000 |
|                                       | Urease                 | 26553.260 | 0.000 |
|                                       | Acid phosphatase       | 108.870   | 0.000 |
|                                       | Alkaline phosphatase   | 492.455   | 0.000 |
|                                       | Arylsulfatase          | 2479.480  | 0.000 |
|                                       | $\beta$ -glucosidase   | 79.710    | 0.000 |
| The yield of grasses                  | Cut I                  | 171.611   | 0.000 |
|                                       | Cut II                 | 5.804     | 0.074 |
|                                       | Cut III                | 1.316     | 0.315 |

F – F-test; P – level of probability.

**Table S2.** Covariance matrices for intergroup effects

| Variable factor | Deh      | Cat      | Ure      | Glu      | Pac     | Pal      | Aryl     | Org      | Act      | Fun      | CD <sub>Org</sub> | CD <sub>Act</sub> | CD <sub>Fun</sub> | EP <sub>Org</sub> | EP <sub>Act</sub> | EP <sub>Fun</sub> | Shannon Phylum | Shannon Class | Shannon Other | Shannon Family |
|-----------------|----------|----------|----------|----------|---------|----------|----------|----------|----------|----------|-------------------|-------------------|-------------------|-------------------|-------------------|-------------------|----------------|---------------|---------------|----------------|
| Cat             | 0.917**  |          |          |          |         |          |          |          |          |          |                   |                   |                   |                   |                   |                   |                |               |               |                |
| Ure             | 0.005    | -0.383   |          |          |         |          |          |          |          |          |                   |                   |                   |                   |                   |                   |                |               |               |                |
| Glu             | 0.513    | 0.151    | 0.759**  |          |         |          |          |          |          |          |                   |                   |                   |                   |                   |                   |                |               |               |                |
| Pac             | -0.374   | -0.680*  | 0.761**  | 0.591*   |         |          |          |          |          |          |                   |                   |                   |                   |                   |                   |                |               |               |                |
| Pal             | -0.025   | -0.416   | 0.993**  | 0.775**  | 0.814** |          |          |          |          |          |                   |                   |                   |                   |                   |                   |                |               |               |                |
| Aryl            | 0.972**  | 0.920**  | -0.103   | 0.493    | -0.347  | -0.112   |          |          |          |          |                   |                   |                   |                   |                   |                   |                |               |               |                |
| Org             | 0.916**  | 0.771**  | 0.107    | 0.702*   | -0.062  | 0.117    | 0.954**  |          |          |          |                   |                   |                   |                   |                   |                   |                |               |               |                |
| Act             | 0.896**  | 0.713**  | 0.208    | 0.760**  | 0.021   | 0.216    | 0.928**  | 0.989**  |          |          |                   |                   |                   |                   |                   |                   |                |               |               |                |
| Fun             | 0.931**  | 0.822**  | 0.018    | 0.618*   | -0.162  | 0.025    | 0.979**  | 0.985**  | 0.977**  |          |                   |                   |                   |                   |                   |                   |                |               |               |                |
| CD Org          | -0.378   | -0.709** | 0.902**  | 0.501    | 0.860** | 0.921**  | -0.448   | -0.230   | -0.121   | -0.304   |                   |                   |                   |                   |                   |                   |                |               |               |                |
| CD Act          | -0.801** | -0.949** | 0.551    | -0.031   | 0.680*  | 0.566    | -0.854** | -0.710** | -0.633*  | -0.764** | 0.813**           |                   |                   |                   |                   |                   |                |               |               |                |
| CD Fun          | 0.558    | 0.191    | 0.826**  | 0.939**  | 0.453   | 0.810**  | 0.473    | 0.625*   | 0.698*   | 0.560    | 0.536             | -0.001            |                   |                   |                   |                   |                |               |               |                |
| EP Org          | -0.886** | -0.700*  | -0.315   | -0.632*  | 0.167   | -0.279   | -0.803** | -0.793** | -0.811** | -0.793** | 0.043             | 0.561             | -0.739**          |                   |                   |                   |                |               |               |                |
| EP Act          | -0.546   | -0.317   | -0.360   | -0.771** | -0.379  | -0.393   | -0.622*  | -0.760** | -0.807** | -0.736** | -0.165            | 0.289             | -0.659*           | 0.450             |                   |                   |                |               |               |                |
| EP Fun          | -0.969** | -0.970** | 0.204    | -0.361   | 0.498   | 0.232    | -0.975** | -0.883** | -0.843** | -0.913** | 0.566             | 0.885**           | -0.373            | 0.761**           | 0.485             |                   |                |               |               |                |
| Shannon Phylum  | -0.553   | -0.189   | -0.774** | -0.971** | -0.524  | -0.775** | -0.511   | -0.690*  | -0.767** | -0.624*  | -0.506            | 0.038             | -0.969**          | 0.682*            | 0.778**           | 0.392             |                |               |               |                |
| Shannon Class   | -0.545   | -0.192   | -0.750** | -0.954** | -0.515  | -0.749** | -0.508   | -0.683*  | -0.760** | -0.618*  | -0.480            | 0.045             | -0.948**          | 0.647*            | 0.791**           | 0.397             | 0.994**        |               |               |                |
| Shannon Other   | -0.143   | 0.156    | -0.769** | -0.677*  | -0.554  | -0.744** | -0.068   | -0.222   | -0.311   | -0.151   | -0.597*           | -0.306            | -0.733**          | 0.256             | 0.491             | 0.020             | 0.765**        | 0.814**       |               |                |
| Shannon Family  | 0.658*   | 0.330    | 0.660*   | 0.887**  | 0.333   | 0.661*   | 0.600*   | 0.731**  | 0.782**  | 0.683*   | 0.387             | -0.179            | 0.912**           | -0.835**          | -0.639*           | -0.481            | -0.875**       | -0.820**      | -0.401        |                |
| Shannon Genus   | 0.609*   | 0.251    | 0.734**  | 0.964**  | 0.470   | 0.740**  | 0.569    | 0.737**  | 0.804**  | 0.678*   | 0.468             | -0.106            | 0.959**           | -0.763**          | -0.750**          | -0.437            | -0.967**       | -0.934**      | -0.588*       | 0.966**        |

\*\*significant values at  $p < 0.01$

\*significant values at  $p < 0.05$
